# Supplementary material for: A facile synthesis of 1,3,6,8-pyrenesulfonic acid tetrasodium salt as a hydrosoluble fluorescent ink for anti-counterfeiting applications
Source: Royal Society of Chemistry journal article supplement (doi:10.1039/c8ra09106d), 2019-01-01
Supplement: c8ra09106d1.pdf [file c8ra09106d1.pdf]

# **A Facile Synthesis of 1,3,6,8-Pyrenesulfonic Acid Tetrasodium Salt as Hydrosoluble Fluorescence Ink for Anti-counterfeiting Applications**

Liangzhe Chen, Biao Hu, Jieyu Zhang, Jinmei Zhang, Shuting Huang,  
Ping Ren, Yang Zou, Fuyuan Ding, Xinghai Liu and Houbin Li\*

School of Printing and Packaging, Wuhan University, Wuhan 430072, P.  
R. China

\*Corresponding author: E-mail: [lhb@whu.edu.cn](mailto:lhb@whu.edu.cn)

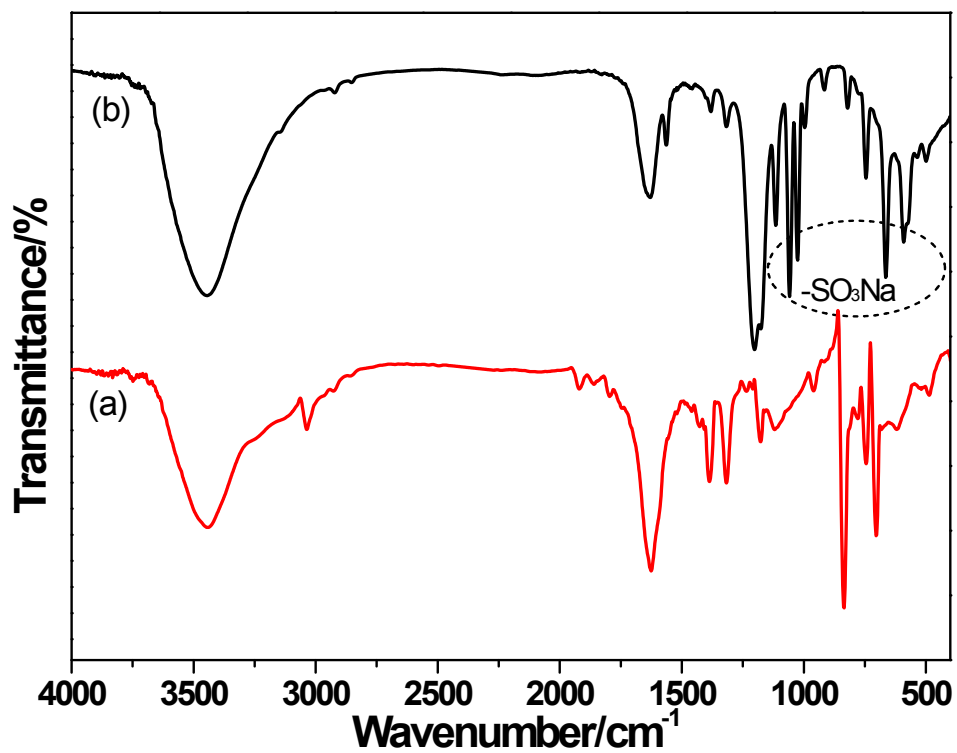

**Fig. S1** FT-IR spectra of (a) pyrene and (b) 1,3,6,8-Pyrenesulfonic Acid Tetrasodium Salt (PTSA).

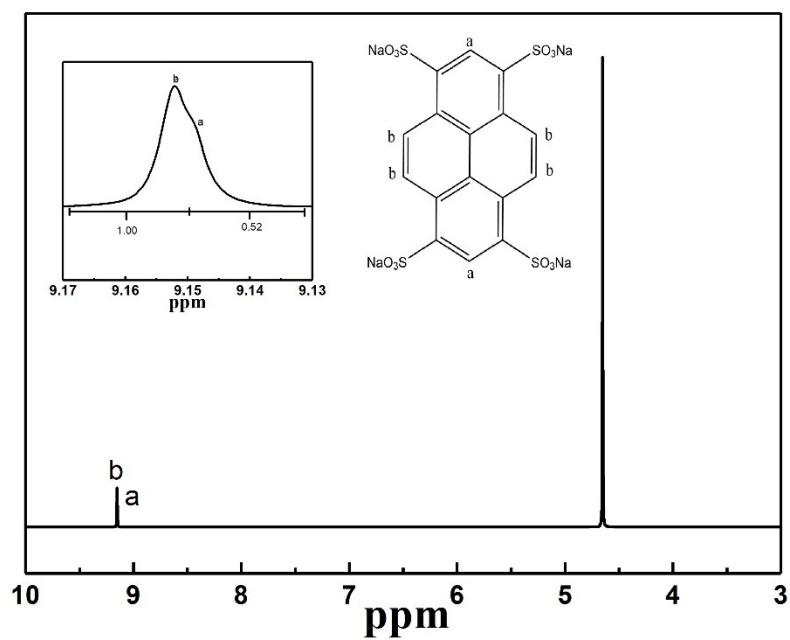

**Fig. S2**  $^1\text{H}$  NMR spectra of PTSA.

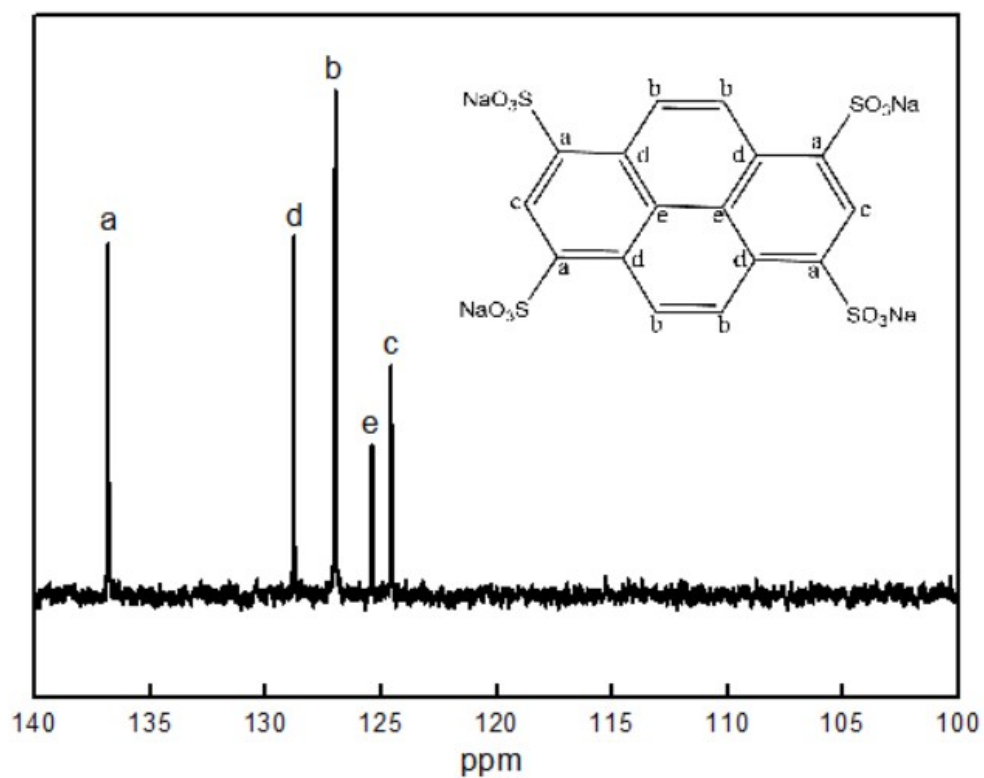

**Fig. S3**  $^{13}\text{C}$  NMR spectra of PTSA.

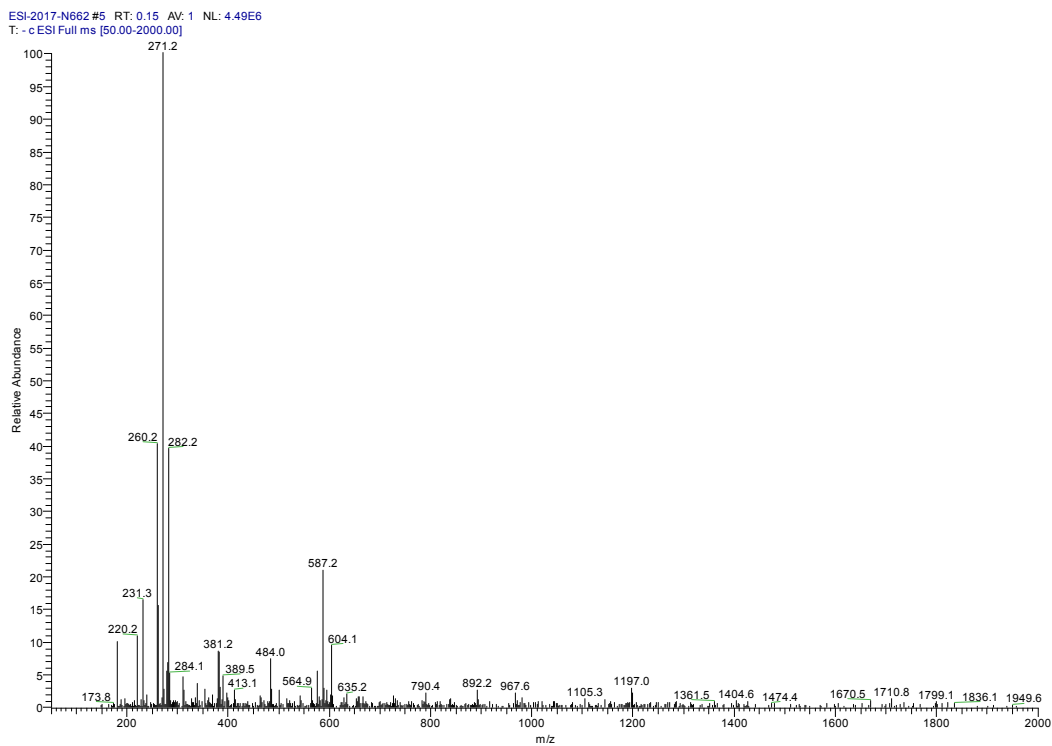

**Fig. S4** MS (ESI) spectra of PTSA.

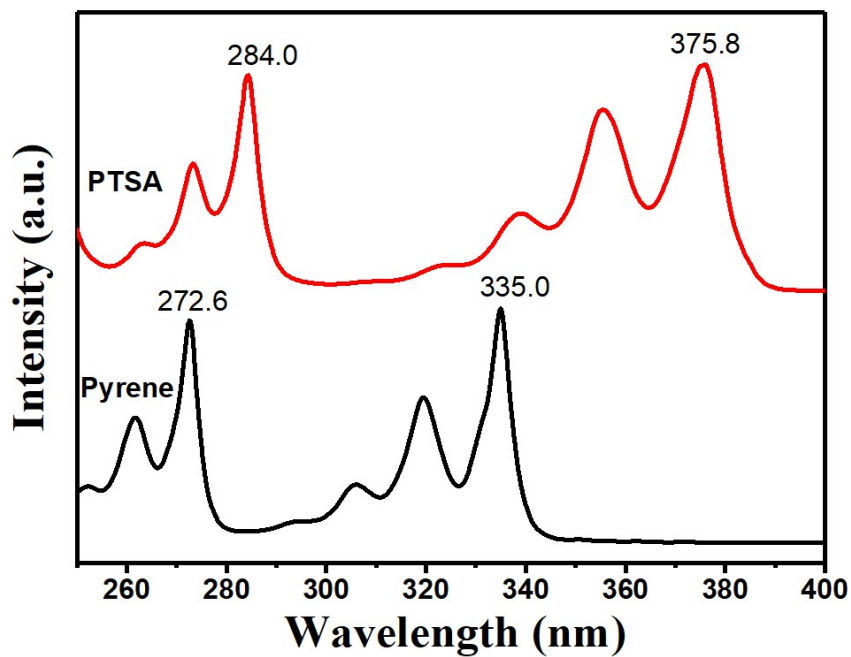

**Fig. S5** UV-Vis spectrum of pyrene (dissolved in ethanol) and PTSA (dissolved in H<sub>2</sub>O).

**Table S1.** Viscosity value of red, green and blue inks during printing simulation.

| Sample    | 0.1 s <sup>-1</sup><br>(before<br>squeegee) | 1000 s <sup>-1</sup><br>(during<br>squeegee) | 0.1 s <sup>-1</sup><br>(after<br>squeegee) | Recovery<br>time(s) |
|-----------|---------------------------------------------|----------------------------------------------|--------------------------------------------|---------------------|
| Red Ink   | 7.4                                         | 0.4                                          | 7.4                                        | 106                 |
| Green Ink | 7.0                                         | 0.4                                          | 7.0                                        | 45                  |
| Blue Ink  | 7.4                                         | 0.4                                          | 7.4                                        | 47                  |

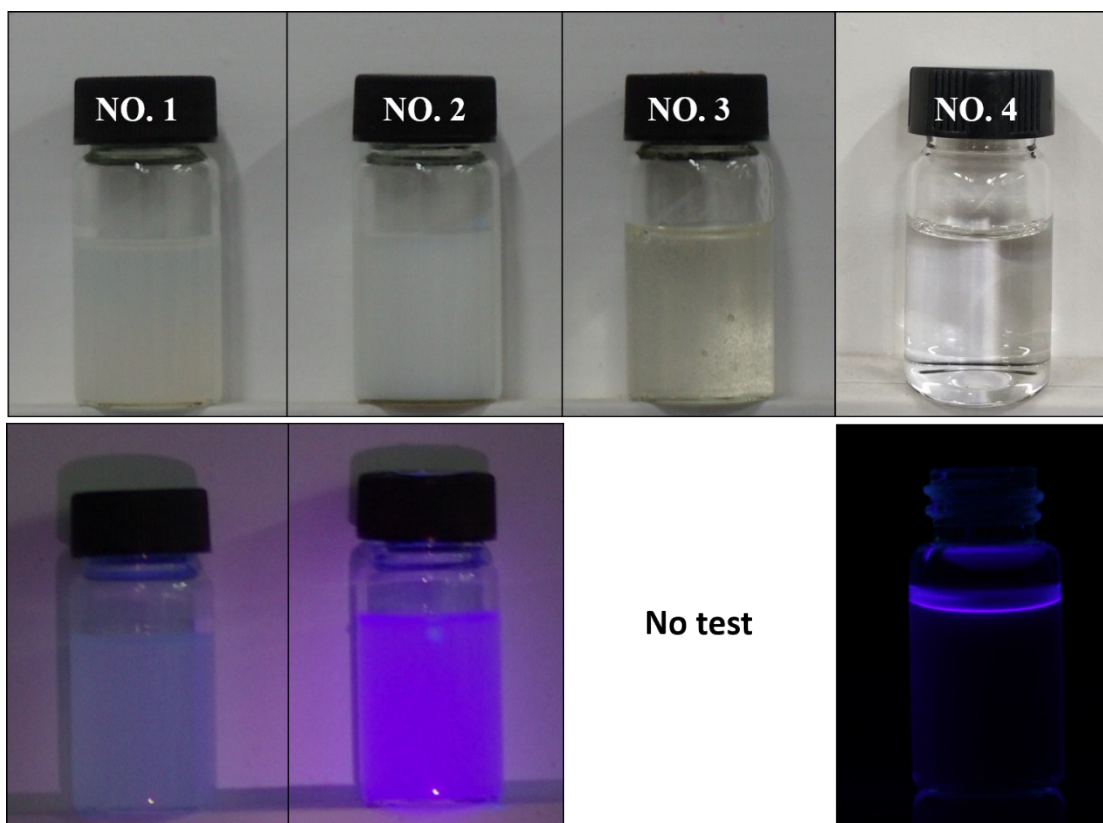

**Fig. S6** Images of the PTSA inks with various ink binders before and after being exposed in 365 nm UV light.

**Table S2.** The composition of the colorless, red, green, and blue inks used for printing.

| Inks       | PTSA/mg | HEC/mg | Pigment/mg | H <sub>2</sub> O/mL |
|------------|---------|--------|------------|---------------------|
| Colourless | 45      | 0.15   | -          | 15                  |
| Red        | 300     | 300    | 50         | 10                  |
| Green      | 300     | 300    | 50         | 10                  |
| Blue       | 300     | 300    | 50         | 10                  |

“-” was represented no test.

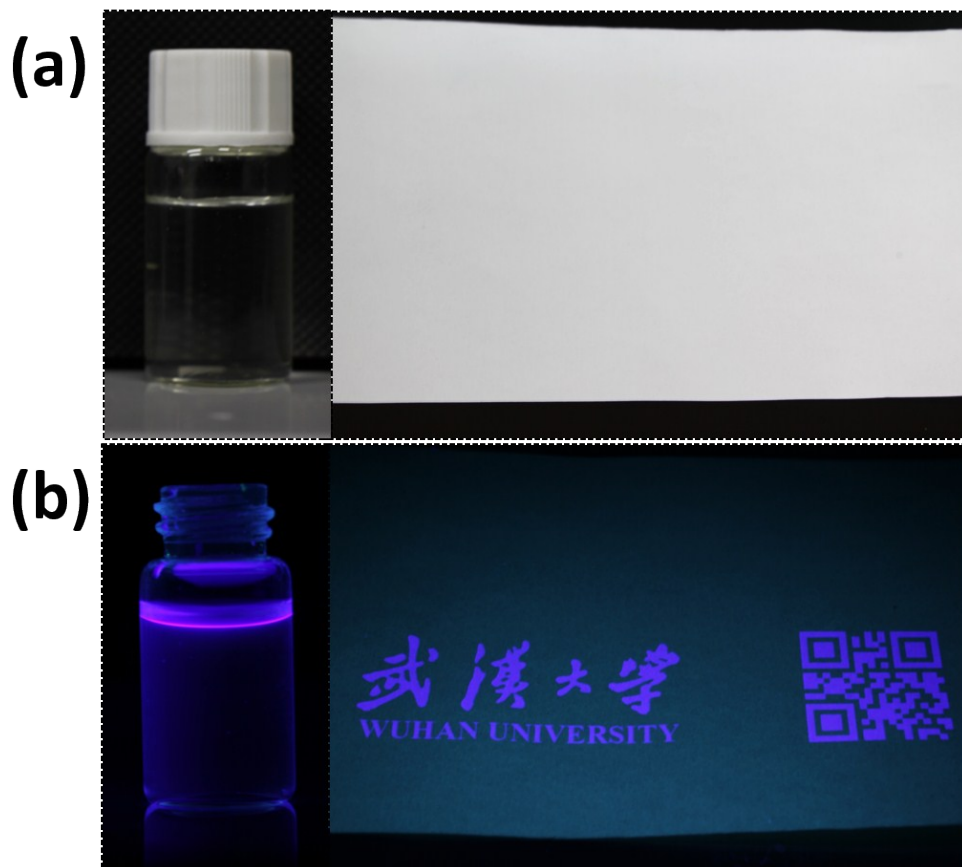

**Fig. S7** Stability test of the ink-jet printing inks after being stored for 30 days (a) under white light, (b) under 365 nm UV light.

**Table S3.** Optical density and color changes ( $L^*$ ,  $a^*$ ,  $b^*$ ,  $\Delta E^*$ ) based on paper substrate before and after being exposed in 365 nm UV light.

| Sample            | $L^*$ | $a^*$  | $b^*$  | $\Delta E^*$ | Optical density |
|-------------------|-------|--------|--------|--------------|-----------------|
| Red ink           | 31.51 | 8.04   | 0.18   | 0            | 1.23            |
| Red ink-UV        | 30.65 | 9.96   | -26.65 | 26.91        | -               |
| Green ink         | 42.68 | -18.96 | -26.94 | 0            | 1.51            |
| Green ink-UV      | 41.12 | -1.01  | -37.87 | 21.07        | -               |
| Blue ink          | 53.41 | -20.72 | 10.91  | 0            | 0.74            |
| Blue ink-UV       | 49.74 | -18.91 | -42.34 | 53.41        | -               |
| Colourless ink    | -     | -      | -      | -            | -               |
| Colourless ink-UV | 30.35 | 6.14   | -20.02 | -            | -               |

“-” was represented no test.
